# Supplementary material
Source: publisher figshare collection journal article supplement (https://tandf.figshare.com/articles/dataset/_/12293048)

Appendix 1. NSW Councils where OSD policy was evaluated. (adapted from <https://commons.wikimedia.org/w/index.php?curid=1758648>).

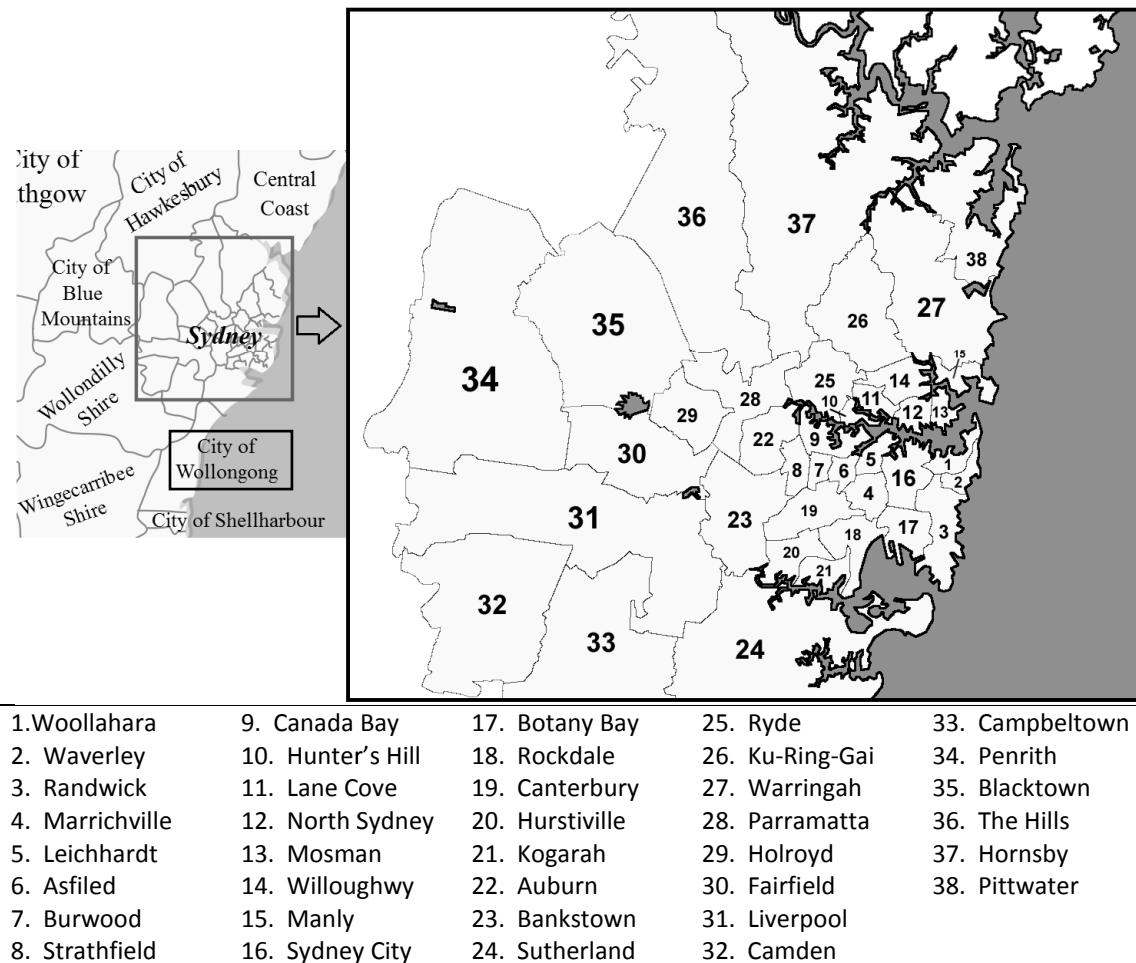

Supplement: Supplementary file 1 [file 1]
