# Supplementary material
Source: publisher figshare collection journal article supplement (https://tandf.figshare.com/articles/dataset/_/12293048)
Supplement: Supplementary file 2 [file 1]

## Appendix 2. Technical requirements in Australian Councils

| Council        | OSD Design Method required                                                      | Design Storm<br>(yr. ARI) | Minimum<br>Orifice<br>Diameter |
|----------------|---------------------------------------------------------------------------------|---------------------------|--------------------------------|
| Wollongong     | PSD and SSR Values                                                              | 5 and 100                 | 50 mm                          |
| Ashfield       | PSD and SSR Values                                                              | 2, 10 and 100             | 65 mm                          |
| Auburn         | PSD and SSR Values                                                              | up to 100                 | -                              |
| Bankstown      | PSD Values and Rational Formula or stage-storage routing model to calculate SSR | up to 10                  | -                              |
| Blacktown      | PSD and SSR Values                                                              | 1,5 and 100               | -                              |
| Botany Bay     | Computer modeling (DRAINS/ILSAX)                                                | up to 100                 | 25 mm                          |
| Burwood        | PSD and SSR Values                                                              | 2, 10 and 100             | -                              |
| Camden         | Rational Method and Computer Models                                             | up to 100                 | 20 mm                          |
| Campbeltown    | Non-time translation hydrograph method or time translation hydrograph method    | up to 100                 | 75 mm                          |
| Canada Bay     | PSD and SSR Values                                                              | 5, 20 and 100             | -                              |
| Canterbury     | Rational Method                                                                 | 10 or 100                 | -                              |
| City of Sydney | PSD and SSR Values                                                              | up to 100                 | 40 mm                          |
| Fairfield      | PSD and SSR Values                                                              | up to 100                 | 35 mm                          |
| Hunters Hill   | PSD and SSR Values                                                              | up to 100                 | -                              |
| Hurstville     | Not informed                                                                    | up to 20                  | -                              |
| Holroyd        | PSD and SSR Values                                                              | up to 100                 | -                              |
| Hornsby        | Not informed                                                                    | up to 20                  | -                              |
| Kogarah        | PSD and SSR Values                                                              | up to 100                 | -                              |
| Ku-ring Gai    | PSD and SSR Values                                                              | up to 100                 | 30 mm                          |
| Lane Cove      | PSD and SSR Values                                                              | up to 100                 | -                              |
| Leichardt      | Not informed                                                                    | up to 100                 | -                              |
| Liverpool      | Computer simulations SSR is to be undertaken by trial and error                 | up to 100                 | 25 mm                          |
| Manly          | PSD and SSR Values                                                              | 5 and 100                 | -                              |
| Marrickville   | Triangular Hydrographs or ILSAX.                                                | up to 100                 | -                              |
| Mosman         | Rational Method                                                                 | 20 or 100                 | 40 mm                          |
| Parramatta     | PSD and SSR Values                                                              | 1,5 and 100               | 25 mm                          |
| Penrith        | PSD and SSR Values                                                              | up to 100                 | 40 mm                          |
| Pittwater      | PSD and SSR Values                                                              | -                         | -                              |
| Randwick       | Rational Method                                                                 | up to 20                  | -                              |
| Rockdale       | PSD and SSR Values                                                              | up to 50                  | 25 mm                          |
| Ryde           | PSD and SSR Values                                                              | up to 100                 | 25 mm                          |
| Strathfield    | PSD and SSR Values                                                              | 2, 10 and 100             | 75 mm                          |
| Sutherland     | Not informed                                                                    | -                         | 75 mm                          |
| The Hills      | PSD and SSR Values                                                              | up to 100                 | -                              |
| Warringah      | PSD and SSR Values                                                              | 5, 20 and 100             | 50 mm                          |
| Waverley       | Mass Curve Method, other methods and DRAINS or RAFTS                            | 20 or 100                 | -                              |
| Willoughby     | PSD and SSR Values                                                              | up to 100                 | 65 mm                          |
| Woollahra      | PSD and SSR Values                                                              | 2 and 100                 | -                              |
